1 **Direct nucleic acid analysis of mosquitoes for high fidelity species identification and**  
2 **detection of *Wolbachia* using a cellphone**

3

4 Sanchita Bhadra <sup>1,\*</sup>, Timothy E. Riedel <sup>2</sup>, Miguel A. Saldaña <sup>3</sup>, Shivanand Hegde <sup>4</sup>, Nicole  
5 Pederson <sup>2</sup>, Grant L. Hughes <sup>5</sup>, and Andrew D. Ellington <sup>1</sup>

6

7 <sup>1</sup> Department of Molecular Biosciences, College of Natural Sciences, The University of Texas at  
8 Austin, Austin, TX 78712, USA.

9 <sup>2</sup> Freshman Research Initiative, College of Natural Sciences, The University of Texas at Austin,  
10 Austin, TX 78712, USA.

11 <sup>3</sup> Department of Microbiology and Immunology, University of Texas Medical Branch, Galveston,  
12 TX 77555, USA.

13 <sup>4</sup> Department of Pathology, University of Texas Medical Branch, Galveston, TX 77555, USA.

14 <sup>5</sup> Department of Pathology, Institute for Human Infections and Immunity, Center for Tropical  
15 Diseases, Center for Biodefense and Emerging Infectious Disease. University of Texas Medical  
16 Branch, Galveston, TX, 77555 USA.

17

18 \*Corresponding author

19 E-mail: [sanchitabhadr@utexas.edu](mailto:sanchitabhadr@utexas.edu)

## 20 **Abstract**

21 Manipulation of natural mosquito populations using the endosymbiotic bacteria *Wolbachia* is being  
22 investigated as a novel strategy to reduce the burden of mosquito-borne viruses. To evaluate the  
23 efficacy of these interventions, it will be critical to determine *Wolbachia* infection frequencies in  
24 *Aedes aegypti* mosquito populations. However, current diagnostic tools are not well-suited to fit this  
25 need. Morphological methods cannot identify *Wolbachia*, immunoassays often suffer from low  
26 sensitivity and poor throughput, while PCR and spectroscopy require complex instruments and  
27 technical expertise, which restrict their use to centralized laboratories. To address this unmet need,  
28 we have used loop-mediated isothermal amplification (LAMP) and oligonucleotide strand  
29 displacement (OSD) probes to create a one-pot sample-to-answer nucleic acid diagnostic platform  
30 for vector and symbiont surveillance. LAMP-OSD assays can directly amplify target nucleic acids  
31 from macerated mosquitoes without requiring nucleic acid purification and yield specific single  
32 endpoint yes/no fluorescence signals that are observable to eye or by cellphone camera. We  
33 demonstrate cellphone-imaged LAMP-OSD tests for two targets, the *Aedes aegypti* cytochrome  
34 oxidase I (*coi*) gene and the *Wolbachia* surface protein (*wsp*) gene, and show a limit of detection  
35 of 4 and 40 target DNA copies, respectively. In a blinded test of 90 field-caught mosquitoes, the  
36 *coi* LAMP-OSD assay demonstrated 98% specificity and 97% sensitivity in identifying *Ae. aegypti*  
37 mosquitoes even after 3 weeks of storage without desiccant at 37 °C. Similarly, the *wsp* LAMP-  
38 OSD assay readily identified the *wAlbB* *Wolbachia* strain in field-collected *Aedes albopictus*  
39 mosquitoes without generating any false positive signals. Modest technology requirements,  
40 minimal execution steps, simple binary readout, and robust accuracy make the LAMP-OSD-to-  
41 cellphone assay platform well suited for field vector surveillance in austere or resource-limited  
42 conditions.

43

## 44 **Author summary**

45 Mosquitoes spread many human pathogens and novel approaches are required to reduce the  
46 burden of mosquito-borne disease. One promising approach is transferring *Wolbachia* into  
47 *Aedes aegypti* mosquitoes where it blocks transmission of arboviruses like dengue, Zika and  
48 Yellow fever viruses and spreads through mosquito populations. For effective evaluation of this  
49 approach, regular surveillance of *Wolbachia* infections in *Ae. aegypti* is required, but current  
50 diagnostic tools are not well suited to support these critical surveillance needs. To fill this need  
51 we developed a simple, robust and inexpensive assay to identify *Ae. aegypti* mosquitoes and  
52 *Wolbachia* using our unique one-pot assay platform, LAMP-OSD, which uses loop-mediated  
53 isothermal amplification to amplify nucleic acid targets at a single temperature. Unlike other  
54 LAMP-based tests, our assays assure accuracy by coupling amplification with novel nucleic acid  
55 strand displacement (OSD) probes that hybridize to specific sequences in LAMP amplification  
56 products and thereby generate simple yes/no readout of fluorescence readable by human eye  
57 and by off-the-shelf cellphones. To facilitate field use, we developed our assays so they are  
58 compatible with crushed mosquito homogenate as the template, meaning no nucleic acid  
59 extraction is required. In blinded tests using field collected mosquitoes, LAMP-OSD-cellphone  
60 tests performed robustly to identify 29 of 30 *Ae. aegypti* even after 3 weeks of storage at 37 °C  
61 while producing only one false positive out of 60 non-specific mosquitoes. Similarly, our assay  
62 could identify *Wolbachia* in field-caught *Aedes albopictus* without producing any false positives.  
63 Our easy to use and easy to interpret assays should facilitate widespread field mosquito  
64 surveillance with minimal instrumentation and high accuracy.

65

66

## 67 **Introduction**

68 Mosquitoes are vectors that can transmit an array of pathogens that often cause devastating human  
69 diseases [1]. Traditionally considered a problem for tropical regions, mosquitoes are increasingly  
70 becoming a global public health challenge [2, 3] due to a changing global environment, urbanization,  
71 increases in the global movement of populations, and the emergence of insecticide resistance [4].  
72 Estimates suggest nearly half the world's population is at risk for mosquito-borne diseases [5, 6],  
73 and as such, there is an urgent need for novel approaches to reduce the burden of disease.

74 One biocontrol countermeasure gaining traction for mosquito control is the release of *Wolbachia*-  
75 infected mosquitoes [7-9]. *Wolbachia* is a maternally-transmitted endosymbiont that can rapidly  
76 become established in the natural mosquito populations and can inhibit a variety of pathogens,  
77 including arboviruses, malaria parasites, and filarial nematodes [10-15]. *Wolbachia* control  
78 strategies are currently being deployed into the field to alter the capacity of *Aedes aegypti* to transmit  
79 arboviruses or to suppress mosquito populations [16-18]. Surveillance of transinfected mosquitoes  
80 as well as natural vector populations is crucial to evaluate the efficacy of these interventions [19].  
81 However, most current screening methods rely on PCR, which is expensive and relies on  
82 laboratory facilities. In addition to screening for *Wolbachia* infection, it would also be desirable to  
83 identify the host mosquito species using these assays since different mosquito species differ in  
84 their ability to transmit pathogens [20]. Knowledge of vector species, and prevalence and stability  
85 of *Wolbachia* is essential for effective vector control and pre-emption of disease outbreaks with  
86 public health measures [21].

87 Unfortunately, mosquitoes are most commonly identified using morphological taxonomic keys.  
88 This process can be tedious, and requires highly trained personnel and undamaged mosquitoes.  
89 Alternative morphological methods such as the identification of morphometric wing characters  
90 [22] are low throughput and require microscopes and complex imaging instruments. Moreover,

91 traditional morphological-based approaches cannot detect associated symbionts or pathogens.  
92 These limitations restrict widespread accessibility and necessitate sample preservation and  
93 transport. On the other end of the spectrum, immunoassay-based tools for identifying pathogen-  
94 infected mosquitoes, such as VecTest™ dipsticks (Medical Analysis Systems Inc.), are portable  
95 and inexpensive. However, these tests have poor sensitivity [23-25] and are not necessarily  
96 available for distinguishing mosquito species or identifying *Wolbachia* endosymbionts.

97 Nucleic acid tests can provide the necessary sensitivity and versatility for identifying both  
98 *Wolbachia* and mosquito species. However, since molecular testing is currently heavily reliant on  
99 PCR [26-28], opportunities for field-based determinations are limited, leading to significant delays  
100 and gaps in actionable surveillance. To support widespread vector surveillance inexpensive,  
101 portable, nucleic acid diagnostic platforms are needed that rapidly produce accurate results without  
102 requiring complex procedures, instruments, and laboratory infrastructure. In this regard, isothermal  
103 nucleic acid amplification assays such as loop-mediated isothermal amplification (LAMP) have  
104 begun to be employed because they do not require complex thermocycling instruments [29-31].  
105 However, although LAMP can rival PCR for sensitivity it often produces spurious amplicons, which  
106 in turn lead to false positive readouts with non-specific reporters such as Mg<sup>2+</sup> precipitation or  
107 fluorescent dye intercalation [32-34].

108 To mitigate the spurious signals that arise with LAMP, we have previously applied principles that  
109 were developed for nucleic acid strand exchange circuits [35-38] to the design of short hemiduplex  
110 oligonucleotide strand displacement (OSD) probes for LAMP [39]. The single stranded ‘toehold’  
111 regions of OSD probes bind to LAMP amplicon loop sequences, and then signal via strand  
112 exchange [40] that leads to separation of a fluorophore and quencher [39]. OSDs are the  
113 functional equivalents of TaqMan probes and can specifically report single or multiplex LAMP  
114 amplicons without interference from non-specific nucleic acids or inhibitors [39, 41]. OSDs  
115 significantly enhance the diagnostic applicability of LAMP, allowing it to match the allelic specificity

116 of real-time PCR. Recently, we engineered these molecular innovations to function fluently in one-  
117 pot LAMP-OSD reactions that can directly amplify a few tens to hundreds of copies of DNA and  
118 RNA analytes from minimally processed specimens and produce sequence-specific fluorescence  
119 signals that are easily observable by the human eye or (more importantly) by unmodified cellphone  
120 cameras [42]. The fluorescence endpoints that are produced can be used for yes/no determinations  
121 of the presence of an analyte, and also estimation of analyte copies on an order of magnitude scale  
122 [42, 43].

123 Here, we have adapted our smartphone-read one-pot LAMP-OSD system to directly amplify target  
124 nucleic acids from crudely macerated mosquitoes and to sequence-specifically report both  
125 mosquito and symbiont amplicons as visually readable fluorescence. In particular, we have  
126 developed two LAMP-OSD assays – one targeting the *Ae. aegypti* cytochrome oxidase I gene  
127 (*co*), and the other the *Wolbachia* wAlbB surface protein (*wsp*) gene. Using a blinded set of field-  
128 caught mosquitoes, we demonstrate the exquisite sensitivity and specificity of our LAMP-OSD  
129 platform for identifying mosquito species and detecting *Wolbachia* infections.

## 130 **Methods**

### 131 **Chemicals and reagents**

132 All chemicals were of analytical grade and were purchased from Sigma-Aldrich (St. Louis, MO,  
133 U.S.A.) unless otherwise indicated. All enzymes and related buffers were purchased from New  
134 England Biolabs (NEB, Ipswich, MA) unless otherwise indicated. All oligonucleotides and gene  
135 blocks (summarized in **S1 Table**) were obtained from Integrated DNA Technologies (IDT,  
136 Coralville, IA, U.S.A.).

### 137 **Preparation of amplification targets**

138 *Ae. aegypti coi* LAMP-OSD target sequence was amplified by PCR from mosquito genomic DNA.  
139 LAMP-OSD target region of the *Wolbachia wAlbB wsp* gene was purchased as a gBlock fragment.  
140 Both amplification targets were cloned into the pCR2.1-TOPO vector (Fisher Scientific, Hampton,  
141 NH) by Gibson assembly according to manufacturer's (NEB) instructions [44]. Cloned plasmids  
142 were selected and maintained in an *E. coli* Top10 strain. Plasmid minipreps were prepared from  
143 these strains using the Qiagen miniprep kit (Qiagen, Valencia, CA, USA). All target inserts were  
144 verified by sequencing at the Institute of Cellular and Molecular Biology Core DNA Sequencing  
145 Facility.

#### 146 **LAMP primer and OSD probe design**

147 *Wolbachia wAlbB* and *wPip* strain *wsp* genes and *Ae. aegypti coi* gene sequences were obtained  
148 from NCBI GenBank. Consensus signature sequences were derived following MUSCLE  
149 (MUltiple Sequence Comparison by Log-Expectation) alignment analysis of each gene set.  
150 Target specificity of these signature sequences was evaluated by comparing them to respective  
151 *wsp* or *coi* gene sets from phylogenetically-related strains and species such as *Wolbachia wMel*  
152 and *Ae. albopictus*, respectively. Both MUSCLE alignment as well as NCBI BLAST [45, 46]  
153 analysis were used for this *in silico* specificity analysis.

154 The Primer Explorer v5 primer design software (Eiken Chemical Co., Japan) was used for  
155 generating several potential LAMP primer sets composed of the outer primers F3 and B3 and the  
156 inner primers FIP and BIP. Primer design was constrained to include at least a 40 bp gap between  
157 the F1 and F2 or between the B1 and B2 priming sites. Primer specificity for targeted sequence  
158 and a corresponding lack of significant cross-reactivity to other nucleic acids of human, vector or  
159 pathogenic origin were further assessed using NCBI BLAST.

160 These primer sets were functionally tested in LAMP assays using zero to several hundred copies  
161 of purified plasmids as templates. Amplification kinetics were measured in real time using the

162 fluorogenic intercalating dye Evagreen and the LightCycler 96 real-time PCR machine (Roche).  
163 The fastest primer sets that detected the fewest template copies with negligible spurious reactivity  
164 in the absence of templates were selected for further assay development.

165 Fluorogenic OSD probes were then designed to undergo toehold-mediated strand exchange with  
166 these *Ae. aegypti coi* and the *Wolbachia wsp* LAMP amplicons. Of the two target derived loop  
167 regions (between the F1c and F2, and the B1c and B2 primer binding sites) the regions between  
168 F1c and F2 were chosen as *wsp* and *coi* OSD binding regions. Fluorogenic OSD probes were  
169 designed using the NUPACK software and our previously described engineering principles [39].  
170 Briefly the hemiduplex OSDs were designed to display 11-12 nucleotide long single-stranded  
171 toeholds on the longer, fluorophore-labeled strands. All free 3'-OH ends were blocked with  
172 inverted dT to prevent extension by DNA polymerase.

173 Single loop primers were designed to bind the second loop region (between B1c and B2 primer  
174 binding sites) of the *wsp* and *coi* LAMP amplicons and accelerate LAMP amplification.

#### 175 **LAMP assay with synthetic DNA template**

176 LAMP assays were assembled in a total volume of 25  $\mu$ l of 1X Isothermal buffer (NEB; 20 mM  
177 Tris-HCl, 10 mM  $(\text{NH}_4)_2\text{SO}_4$ , 50 mM KCl, 2 mM  $\text{MgSO}_4$ , 0.1% Tween 20, pH 8.8 at 25°C). The  
178 buffer was supplemented with 0.4 mM dNTPs, 0.8 M betaine, 2 mM additional  $\text{MgCl}_2$ , 1.6  $\mu$ M  
179 each of FIP and BIP, 0.8  $\mu$ M of loop primer, 0.4  $\mu$ M each of F3 and B3 primers, and 16 units of  
180 *Bst* 2.0 DNA polymerase. Plasmid DNA templates were serially diluted in TE buffer (10 mM Tris-  
181 HCl, pH 7.5:0.1 mM EDTA, pH 8.0) immediately prior to use. Zero to several hundred copies of  
182 synthetic plasmid templates were added to the LAMP reaction mixes followed by 90 min of  
183 incubation at 65 °C.

#### 184 **Real-time detection of LAMP amplicons using intercalating dyes**



185 1X EvaGreen (Biotium, Hayward, CA, USA) was included in LAMP assays that were then  
186 analyzed using the LightCycler 96 real-time PCR machine (Roche, Basel, Switzerland). Reactions  
187 were subjected to 45 cycles of two-step incubations – step 1:150 sec at 65 °C, step 2: 30 sec at  
188 65 °C. EvaGreen signal was measured in the FAM channel during step 2 of each cycle.  
189 Subsequently, amplicons were subjected to a melt analysis by incubation at 65 °C for 1 min  
190 followed by incremental rise in temperature to 97 °C. Amplicon melting was monitored by  
191 measuring fluorescence at the rate of 10 readings per °C change in temperature. The resulting  
192 data was analyzed using the LightCycler 96 analysis software to measure C<sub>q</sub> values for  
193 amplification and amplicon melting temperatures.

#### 194 **Real-time detection of LAMP amplicons using OSD probes**

195 LAMP reactions monitored in real time using OSD probes were assembled and analyzed as  
196 above with the following changes. First, OSD probes were prepared by annealing 1 μM of the  
197 fluorophore-labeled OSD strand with 5 μM of the quencher-labeled strand in 1X Isothermal buffer.  
198 Annealing was performed by denaturing the oligonucleotide mix at 95 °C for 1 min followed by  
199 slow cooling at the rate of 0.1 °C/s to 25 °C. Excess annealed probe was stored at -20 °C.  
200 Annealed OSD probes were added to the LAMP reactions at a final concentration of 100 nM of  
201 the fluorophore-bearing strand.

#### 202 **Endpoint visual readout and smartphone imaging of LAMP-OSD assays**

203 LAMP-OSD assays intended for visual readout and smartphone imaging were assembled in 0.2  
204 ml optically clear thin-walled tubes with low auto-fluorescence (Axygen, Union City, CA, USA).  
205 Following 90 min of amplification at 65 °C, LAMP-OSD reactions were incubated at 95 °C for 1  
206 min followed by immediate transfer to room temperature and fluorescence imaging. Images were  
207 acquired using an unmodified iPhone 6 and an UltraSlim-LED transilluminator (Syngene,  
208 Frederick, MD, USA). In some experiments, our previously described in-house 3D-printed imaging

209 device [42] was used for LAMP-OSD fluorescence visualization and smartphone imaging. Briefly,  
210 this device uses Super Bright Blue 5 mm light emitting diodes (LED) (Adafruit, New York, NY,  
211 USA) to excite OSD fluorescence. Two cut-to-fit layers of inexpensive >500 nm bandpass orange  
212 lighting gel sheets (Lee Filters, Burbank, CA, USA) on the observation window filter the OSD  
213 fluorescence for observation and imaging.

#### 214 **Rearing and collection of mosquitoes**

215 *Ae. aegypti*, *Ae. Albopictus*, *Culex tarsalis*, *Cu. quinquefasciatus* (Houston), and *Cu.*  
216 *quinquefasciatus* (Salvador) mosquitoes were reared under conventional conditions in the  
217 insectary at the University of Texas medical Branch, Galveston, TX, USA. Four to seven day old  
218 mosquitoes were collected and immediately frozen for shipment, storage and subsequent testing.  
219 To obtain blood fed insects, *Aedes* mosquitoes were starved for a period of 24 hours then offered  
220 a sheep blood meal (Colorado Serum Company, Denver, CO, USA) using a hemotek membrane  
221 system (Hemotek). Unfed mosquitoes were separated and mosquitoes that were engorged were  
222 collected 24 hours post feeding and processed in the same manner as unfed mosquitoes. For  
223 field collections, female mosquitoes were trapped using Fay prince trap (John W. Hock) baited  
224 with CO<sub>2</sub> in Galveston, Texas. 90 mosquitoes were morphologically identified and sorted into  
225 three blinded groups that were stored at -20 °C, 4 °C and 37 °C, respectively for up to 3 weeks  
226 prior to LAMP-OSD analysis.

#### 227 **LAMP-OSD analysis of mosquitoes**

228 For LAMP-OSD analysis individual mosquitoes were prepared either in 1 cc syringes or in 1.5 ml  
229 microcentrifuge tubes as follows. In-syringe preparation: The plunger was removed from a 1 cc  
230 syringe and a 0.5 µm pore size 1/8<sup>th</sup> inch diameter frit (catalog # 59037, Sigma-Aldrich, St. Louis,  
231 MO, USA) was placed inside the syringe. A single mosquito was placed on top of the frit and  
232 macerated thoroughly using the syringe plunger. 100 µl of water was aspirated into the syringe to

233 fully re-suspend the macerated mosquito prior to evicting this mosquito-containing water from the  
234 syringe into a microcentrifuge collection tube. A 2  $\mu$ l aliquot of this sample was directly tested by  
235 LAMP-OSD assays. In-tube preparation: A single mosquito was placed in a 1.5 ml microcentrifuge  
236 tube and manually macerated using a disposable micropestle (Fisherbrand™ RNase-Free  
237 Disposable Pellet Pestles, Cat # 12-141-364, Fisher Scientific, Hampton, NH, USA). Each  
238 macerated mosquito was resuspended in 100  $\mu$ l water. A 2  $\mu$ l 1:10 diluted aliquot of this mosquito  
239 sample was directly assessed by LAMP-OSD analysis.

## 240 **Statistical analysis**

241 The paired results of morphological identification and LAMP-OSD analysis were compared using  
242 2x2 contingency tables. Sensitivity or true positive rate was calculated by using the formula  
243  $TP/(TP+FN)$  where TP are true positive samples, and FN are false negative samples. Specificity  
244 or true negative rate was calculated using the formula  $TN/(TN+FP)$  where TN are true negative  
245 samples and FP are false positive samples.

## 246 **Results**

### 247 **Development of visually read LAMP-OSD assays to identify mosquito species and** 248 ***Wolbachia* infection**

249 LAMP uses two inner (FIP and BIP) and two outer (F3 and B3) primers specific to six consecutive  
250 target sequences (B3, B2, B1, F1c, F2c and F3c) (**S2 Fig**) [47]. *Bst* DNA polymerase extends  
251 these primers by strand displacement DNA synthesis to form  $10^9$  to  $10^{10}$  copies of  
252 concatemerized amplicons with loops between the F1 and F2, B1 and B2, F1c and F2c, and B1c  
253 and B2c regions. We use an additional fifth primer that binds to one of these loop regions and  
254 accelerates amplification [41]. OSD probes, with blocked 3'-ends that prevents spurious signaling  
255 from polymerase-mediated extension, hybridize to the second loop region (**S2 Fig**).

256 To enable molecular identification of *Ae. aegypti* mosquitoes, we designed a smartphone-  
257 imaged LAMP-OSD assay to amplify and detect a signature sequence in the mitochondrial  
258 cytochrome c oxidase I (*coi*) gene. Each cell has multiple mitochondria and hence several  
259 hundred copies of the *coi* gene, which should enable detection from a very small amount of  
260 sample. Moreover, mitochondrial *coi* gene sequences are commonly used as barcodes for  
261 molecular identification of animal species including distinction of mosquito species; our chosen  
262 *coi* signature sequence was assigned to *Ae. aegypti* when queried against the Barcode of Life  
263 Data Systems (BOLD; <http://www.boldsystems.org/index.php>) *coi* signature sequence database  
264 [48-51].

265 We developed a second visually read LAMP-OSD assay targeting the *Wolbachia* surface  
266 protein (*wsp*) gene to identify *Wolbachia*-infected insects. The *wsp* gene is widely used as a  
267 marker for strain typing and screening for infected insect vectors [28, 52]. We engineered our  
268 *wsp* LAMP outer and inner primers to be complementary to, and hence amplify, two *Wolbachia*  
269 strains, the *wAlbB* and the closely related *wPip* (**S3 Fig**). We deliberately designed our assay to  
270 detect both strains in order to ensure that we could assess field-collected mosquitoes  
271 irrespective of temporal and spatial variation in relative abundance of *wAlbB*-infected *Ae.*  
272 *albopictus* and *wPip*-infected *Cu. quinquefasciatus* mosquitoes in our collection area [53, 54].  
273 Significant nucleic acid sequence variation should prevent amplification of the *wsp* gene from all  
274 other *Wolbachia* groups (**S3 Fig**). To enable transduction of both *wAlbB* and *wPip* *wsp* LAMP  
275 amplicons to visible fluorescence we designed an OSD probe that is specific to an identical loop  
276 sequence present in both amplicons.

277 With a single endpoint visual 'yes/no' readout of OSD fluorescence (either directly observed or  
278 imaged using cellphone camera), the *Ae. aegypti* *coi* LAMP-OSD assay could reliably identify  
279 the presence of as few as 4 copies of synthetic target DNA (**Fig 1**). Similarly, the cellphone-  
280 imaged *wsp* LAMP-OSD assay produced bright visible fluorescence when presented with only

281 40 copies of its target sequence. In the absence of target DNA, neither assay generated  
282 spurious signal.

283

284 **Fig 1. Detection of *Ae. aegypti coi* gene and *Wolbachia wAlbB wsp* gene using visually**  
285 **read LAMP-OSD assays.** Indicated copies of recombinant plasmids bearing *coi* or *wsp* target  
286 sequences were amplified by the *coi*-specific **(A)** or *wsp*-specific **(B)** LAMP-OSD assays,  
287 respectively. OSD fluorescence was imaged at endpoint using a cellphone.

288

### 289 **Direct LAMP-OSD analysis of crudely crushed mosquitoes**

290 Our next goal was to demonstrate the ability of these LAMP-OSD assays to detect naturally  
291 occurring target sequences in mosquitoes. At the same time, we wanted to ensure that  
292 minimally processed samples would be compatible with our detection platform in order to  
293 facilitate rapid in-field vector testing with fewest instruments and user-required steps.

294 Therefore, as an initial approach, we developed the 'in-syringe' method for rapid sample  
295 preparation wherein individual mosquitoes were crushed inside 1 cc syringes using the syringe  
296 plunger as a pestle. A small chromatography column frit placed inside the syringe served as a  
297 pedestal that aided maceration and removed larger particulates when the macerated sample  
298 was re-suspended in water and recovered. Small portions (up to 8% of a LAMP-OSD reaction)  
299 of these macerated samples were added directly to LAMP-OSD reactions, which were then  
300 incubated for 90 min at 65 °C to initiate and sustain amplification.

301 Endpoint visual examination of these assays for the presence or absence of OSD fluorescence  
302 revealed that our visually read LAMP-OSD system is compatible with direct analysis of crudely

303 processed mosquitoes (**Fig 2**). The *coi* LAMP-OSD assay generated bright fluorescence readily  
304 distinguishable from sample auto-fluorescence when seeded with crudely prepared *Ae. aegypti*  
305 mosquitoes. In contrast, closely related *Ae. albopictus* failed to instigate false positive signal.  
306 Similarly, the *wsp* LAMP-OSD assay generated bright fluorescence in response to *Ae.*  
307 *albopictus* and *Cu. quinquefasciatus* mosquitoes, which are naturally infected with *wAlbB* and  
308 *wPip Wolbachia*, respectively, but remained negative in the presence of unrelated *Wolbachia*  
309 *wMel* and uninfected mosquitoes (**Fig 2 and S4 Fig**).

310

311 **Fig 2. Visually read LAMP-OSD analysis of crudely processed mosquito samples. (A)**

312 Schematic depicting rapid preparation of crude mosquito samples for direct LAMP-OSD  
313 analysis by performing in-syringe individual mosquito maceration. **(B)** Analysis of individual *Ae.*  
314 *aegypti* and *wAlbB Wolbachia*-infected *Ae. albopictus* mosquitoes by *coi* and *wsp* LAMP-OSD  
315 assays, respectively. 2  $\mu$ L of mosquito samples were either added directly to LAMP-OSD  
316 assays or subjected to 10-fold serial dilution in water prior to introduction in LAMP-OSD  
317 reactions. LAMP-OSD reactions without any macerated mosquito samples served as negative  
318 controls. Assays lacking LAMP primers but containing macerated mosquito samples served as  
319 controls for monitoring background fluorescence. **(C)** Specificity analysis of *coi* and *wsp* LAMP-  
320 OSD assays. The *coi* LAMP-OSD assay was challenged with 2  $\mu$ L of *Ae. albopictus* in-syringe  
321 prepared crude mosquito sample. Similarly, the *wsp* LAMP-OSD assay was challenged with *Ae.*  
322 *aegypti* sample. In all experiments, OSD fluorescence was imaged at endpoint using a  
323 cellphone.

324

325 These results indicate that the *Wolbachia wsp* and *Ae. aegypti coi* LAMP-OSD assays are able  
326 to specifically amplify and signal the presence of their target DNA directly from crudely crushed

327 mosquito samples without requiring any extraction and purification of nucleic acids.  
328 Furthermore, the large burden of non-specific nucleic acids as well as other molecular and  
329 macroscopic components present in a crude mosquito sample did not compromise signal  
330 accuracy. We also confirmed the absence of significant inhibition of amplification and signaling  
331 by recapitulating the detection limit of synthetic DNA targets in a background of crude non-  
332 specific mosquito sample. The *coi* and *wsp* LAMP-OSD assays could detect 4 and 40 target  
333 copies, respectively, even in the presence of 8% reaction volume of crude mosquito sample (**S5**  
334 **Fig**).

### 335 **Testing blood-fed mosquitoes with LAMP-OSD**

336 Mosquitoes feeding on blood meals have been reported to engorge on 1 nL to as much as 6  $\mu$ L  
337 of blood [55]. It is conceivable that the blood meal might confound visual LAMP-OSD  
338 fluorescence analysis by contributing auto-fluorescence. To ascertain compatibility of visually  
339 read LAMP-OSD with direct analysis of crudely prepared blood-engorged mosquitoes, we  
340 challenged both *coi* and *wsp* LAMP-OSD assays with crude in-syringe preparations of blood  
341 engorged *Ae. aegypti* and *Ae. albopictus* mosquitoes. Mosquitoes that had recently consumed a  
342 blood meal could be directly analyzed by visual LAMP-OSD without diminution of signal to noise  
343 ratio (**Fig 3**).

344

345 **Fig 3. Effect of blood meal on LAMP-OSD analysis of crudely prepared individual**  
346 **mosquitoes.** Individual normal or blood-fed *Ae. aegypti* and *Ae. albopictus* mosquitoes were  
347 prepared by the in-syringe method. 2  $\mu$ L of these mosquito samples were analyzed by *coi* and  
348 *wsp* LAMP-OSD assays. LAMP-OSD reactions without any macerated mosquito samples served  
349 as negative controls. Assays lacking LAMP primers but containing macerated mosquito samples

350 served as controls for monitoring background fluorescence. LAMP-OSD fluorescence was  
351 imaged at endpoint using a cellphone.

352

### 353 **Analysis of blinded field-caught mosquitoes with cellphone-imaged LAMP-OSD assays**

354 To validate assay performance under more rigorous conditions, we challenged the LAMP-OSD  
355 system with a blinded set of 90 field-caught mosquitoes comprised of *Ae. aegypti*, *Ae.*  
356 *albopictus*, and *Ochlerotatus* species. The mosquitoes were divided into three groups of 30  
357 individuals that were stored without desiccant at -20 °C, 4 °C, or 37 °C for 1, 2, or 3 weeks prior  
358 to testing. To reduce mosquito processing cost, footprint, and time for this large study, we  
359 further simplified sample preparation requirements by optimizing the “in-tube” mosquito  
360 preparation method wherein each mosquito was crushed with a micropestle directly in a  
361 microcentrifuge tube followed by resuspension in water and introduction in a LAMP-OSD  
362 reaction.

363 The visually read *coi* LAMP-OSD assay demonstrated an overall sensitivity (true positive rate)  
364 of 97% and specificity (true negative rate) of 98% when compared to morphological typing of  
365 field-caught mosquito species (**Fig 4, S6, S7, S8**). On closer inspection of the data, it is evident  
366 that even after three weeks of mosquito collection and storage at temperatures as high as 37 °C  
367 the *coi* LAMP-OSD assay was correctly able to identify 29 out of 30 *Ae. aegypti* mosquitoes.  
368 The single mosquito that the LAMP-OSD assay failed to identify had been stored at 37 °C for a  
369 week prior to testing. We ruled out lack of amplifiable nucleic acids or their incompatibility with  
370 *coi* LAMP primers and OSD probe by PCR amplifying the relevant *coi* LAMP target and verifying  
371 its sequence.

372



373 **Fig 4. Blinded LAMP-OSD analysis of field-caught mosquitoes.** Mosquitoes stored for up to  
374 three weeks at the indicated temperatures were prepared by 'in-tube' crude processing. 2  $\mu$ L of  
375 a 1:10 dilution of each mosquito sample was analyzed by *wsp* and *coi* LAMP-OSD assays. OSD  
376 fluorescence was imaged at endpoint using a cellphone. **(A)** Schematic depicting 'in-tube'  
377 method for rapid preparation of field-caught mosquitoes for LAMP-OSD analysis. **(B)**  
378 Comparison of *coi* LAMP-OSD results with morphological identification using 2X2 contingency  
379 table. **(C)** Tabulation of *coi* and *wsp* LAMP-OSD readout for each mosquito in the study. *Ae.*  
380 *aegypti*, *Ae. albopictus* and *Ochlerotatus* species are highlighted in blue, orange and white,  
381 respectively. 'Y' indicates a positive LAMP-OSD signal (bright fluorescence). 'N' indicates  
382 absence of any fluorescence signal in the LAMP-OSD reaction. Red boxes highlight LAMP-OSD  
383 tests that generated false positive or false negative outcomes.

384

385 Of the 60 non-*Ae. aegypti* mosquitoes analyzed by *coi* LAMP-OSD, only one mosquito  
386 generated a false positive signal. Sequence analysis of its *coi* gene ruled out mis-firing of the *coi*  
387 LAMP-OSD assay. It is possible that this LAMP assay was inadvertently contaminated with a  
388 small amount of a pre-formed *Ae. aegypti* amplicon.

389 The *Wolbachia wAlbB/wPip wsp* LAMP-OSD assay did not generate a positive signal from any  
390 non-*Ae. albopictus* mosquito. This is expected since natural populations of *Ae. aegypti* and most  
391 *Ochlerotatus* species are not infected with *Wolbachia* [56, 57]. However, ability of the *wsp* assay  
392 to identify *Wolbachia* infection was influenced by the storage temperature of mosquitoes. The  
393 *wsp* LAMP assay could readily identify *Wolbachia* infection in 3 out of 4 *Ae. albopictus*  
394 mosquitoes stored at -20 °C for as long as 3 weeks. PCR analysis of the *wsp*-negative mosquito  
395 using previously described primers (81F and 691R) and protocols [28] did not produce  
396 amplicons suggesting that this individual was likely uninfected or had *Wolbachia* levels below

397 the levels detectable by PCR. As the storage temperature was increased the frequency of  
398 *Wolbachia* detection dropped. While 40% of *Ae. albopictus* mosquitoes stored at 4 °C gave a  
399 positive *wsp* LAMP-OSD signal, none of the *Ae. albopictus* mosquitoes kept at 37 °C for even  
400 as little as 1 week were *wsp* positive. All mosquitoes that failed to generate a signal by LAMP  
401 also failed to produce *wsp* PCR amplicons. Since, 95-99% of *Ae. albopictus* mosquitoes in the  
402 wild are typically found to be infected with *Wolbachia* [58], these results are suggestive of  
403 nucleic acid deterioration in mosquitoes upon storage at high temperature.

## 404 **Discussion**

405 Mosquito control strategies that rely on the introduction of *Wolbachia* are now being deployed  
406 around the world [7-9], and the surveillance of efficacy and spread require agile, field-based  
407 methods for both mosquito and symbiont detection. Unfortunately, currently available tools for  
408 mosquito diagnostics have several shortcomings. Morphological identification methods are  
409 inherently low throughput, require extensive technical expertise, and cannot also readily identify  
410 pathogens or biocontrol agents such as *Wolbachia*. Spectroscopy, such as near infrared  
411 spectroscopy [59] and Fourier transform infrared spectroscopy [60], allow identification of  
412 mosquito species, *Wolbachia*, and pathogens, but require expensive instruments and expertise that  
413 are generally incompatible with low-resource settings. Immunoassays can detect pathogen-  
414 carrying vectors but are insensitive and cannot also identify vector species. Nucleic acid  
415 amplification methods could potentially look at both vector and symbiont sequences, but are heavily  
416 reliant on PCR with the ensuing encumbrances of expensive instruments and trained operators,  
417 again precluding widespread use.

418 Isothermal nucleic acid amplification assays would facilitate field-based vector monitoring, but most  
419 reported approaches rely on nucleic acid purification and non-specific readout, and thus suffer from  
420 laborious setup and the risk of false positives [61-63]. Probe-read isothermal methods such as the

421 recombinase polymerase assay (RPA) are more reliable but still require expensive and proprietary  
422 reaction formulations and probes, which limits their flexibility and versatility in assay engineering.  
423 Furthermore, most RPA applications for vector diagnostics [64] also depend on extensive sample  
424 processing and nucleic acid purification prior to amplification.

425 These drawbacks led us to develop a simpler, more robust field-deployable assay based on loop-  
426 mediated isothermal amplification (LAMP) that can identify both mosquito species and specific  
427 *Wolbachia* strains in mosquitoes. While LAMP assays have previously been developed for  
428 *Wolbachia* detection by targeting the 16S rRNA gene for amplification [61], these assays required  
429 extraction and purification of DNA prior to assay, and used non-specific readouts that were highly  
430 prone to false positive signals.

431 To overcome these barriers to the use of LAMP, we have previously adopted methods that  
432 originated in the field of nucleic acid computation: the use of strand exchange reactions that  
433 initiate at complementary single-stranded ‘toeholds’ and progresses via branch migration. The  
434 base-pairing predictability and programmability of strand exchange kinetics promotes the  
435 construction of exquisitely sequence-specific oligonucleotide strand displacement (OSD) probes  
436 for LAMP amplicons (**S2 Fig**), thereby greatly reducing the detection of non-specific amplification  
437 background [39, 41, 42]. For instance, we recorded positive *coi* LAMP-OSD signals from field-  
438 caught *Ae. aegypti* mosquitos but did not detect signal from closely related *Ae. albopictus* and  
439 *Ochlerotatus* species mosquitoes. Similarly, the *wsp* assay detected *wAlbB* and *wPip*, as  
440 expected, but not *wMel Wolbachia*.

441 Strand exchange circuits have the additional advantage that they can be used to embed  
442 algorithms and act as ‘matter computers’ [35-37, 65]. For example, strand exchange transducers  
443 can logically integrate multiple analytes; transform nucleic acids to glucose and human chorionic  
444 gonadotrophin (hCG); adapt readout to beads, paperfluidics, glucose meters, pregnancy test

445 strips, and cellphones, and allow target copy number estimation using a single endpoint yes/no  
446 readout of presence or absence of signal above an adjustable threshold [66-69]. In the current  
447 instance, we deliberately designed our *wsp* LAMP-OSD assay to ‘compute’ the presence of both  
448 *wAlbB* and *wPip* in order to increase our odds of finding infected field-caught mosquitoes.  
449 However, the dependence of strand exchange efficiency on toehold binding strength [39] can be  
450 exploited to engineer yes/no distinctions between strain-specific single nucleotide polymorphisms  
451 [39], and the same dual *wsp* assay could be rendered strain-specific by simply substituting an  
452 OSD reporter specific to an alternate polymorphic loop sequence (**S3 Fig**). This might be  
453 advantageous for strain discrimination if double infections were released during vector control  
454 measures [70, 71].

455 By using our one-pot LAMP-OSD assay, macerated mosquito homogenates could be directly  
456 analyzed and ‘yes/no’ visual readouts could be quickly ascertained with a cell phone in the field  
457 without the requirement for laboratory equipment or technical training. Moreover, since our  
458 assays can accurately analyze mosquitoes several days after capture – the *coi* LAMP-OSD assay  
459 could for example identify mosquitoes after 3 weeks at 37 °C without desiccant – mosquitoes from  
460 remote collection outposts can potentially be analyzed even after delayed retrieval. The flexibility  
461 of assay timing is further accommodated by the fact that lyophilized LAMP-OSD reaction mixes  
462 that can be stored and deployed without cold chain [42]. These combined features make our  
463 assay platform the best tool to date for expanding vector surveillance to resource poor settings  
464 [72], especially in that the ease of use should allow minimally trained citizen scientists to  
465 participate in otherwise sophisticated public health monitoring operations in the field.

466 The development efforts that we have put into LAMP-OSD should now allow it to be generalized  
467 to screening other microbes or mosquito phenotypes in field settings. For example, LAMP-based  
468 assays have been developed to identify pathogens transmitted by mosquitoes and insecticide  
469 resistance alleles [73-76], but these rely on purified nucleic acid as templates and non-specific

470 readout whereas our method functions with mosquito homogenate and ensures accuracy using  
471 unique sequence-specific strand exchange probes. In addition, this technology could be used to  
472 identify gut microbes and insect-specific viruses associated with mosquitoes, which is of growing  
473 interest given that it is becoming clear that the microbiome can shape vector competence for  
474 human pathogens [77-79]. Overall, we have demonstrated a versatile nucleic acid diagnostic  
475 platform for rapid and accurate analyses of both insect vectors and symbionts, and that can now  
476 be further configured for additional applications.

## 477 **Acknowledgements**

478 We would like to thank Dr. Holly Wichman (Department of Biological Sciences, Center for  
479 Modeling Complex Interactions, University of Idaho, Moscow, ID 83844-3051) for the generous  
480 gift of *wMel Wolbachia*-infected *Drosophila* fruit flies. We would also like to thank the UTMB  
481 insectary core for providing the lab-reared mosquitoes.

## 482 **References**

- 483 1. WHO (2014) A global brief on vector-borne diseases.  
484 [http://apps.who.int/iris/bitstream/10665/111008/1/WHO\\_DCO\\_WHD\\_2014.1\\_eng.pdf](http://apps.who.int/iris/bitstream/10665/111008/1/WHO_DCO_WHD_2014.1_eng.pdf).  
485 Last accessed on March 1st, 2018.
- 486 2. Zeller H, Marrama L, Sudre B, Van Bortel W and Warns-Petit E (2013) Mosquito-borne  
487 disease surveillance by the European Centre for Disease Prevention and Control. *Clin*  
488 *Microbiol Infect* 19: 693-698.
- 489 3. Kraemer MUG, Sinka ME, Duda KA, Mylne AQN, Shearer FM, et al. (2015) The global  
490 distribution of the arbovirus vectors *Aedes aegypti* and *Ae. albopictus*. *Elife* 4.

- 491 4. Ranson H and Lissenden N (2016) Insecticide Resistance in African Anopheles  
492 Mosquitoes: A Worsening Situation that Needs Urgent Action to Maintain Malaria  
493 Control. *Trends Parasitol* 32: 187-196.
- 494 5. Hay SI, Guerra CA, Tatem AJ, Noor AM and Snow RW (2004) The global distribution  
495 and population at risk of malaria: past, present, and future. *Lancet Infect Dis* 4: 327-336.
- 496 6. Bhatt S, Gething PW, Brady OJ, Messina JP, Farlow AW, et al. (2013) The global  
497 distribution and burden of dengue. *Nature* 496: 504-507.
- 498 7. Iturbe-Ormaetxe I, Walker T and Neill SLO (2011) Wolbachia and the biological control  
499 of mosquito-borne disease. *EMBO reports* 12: 508-518.
- 500 8. Bourtzis K, Dobson SL, Xi ZY, Rasgon JL, Calvitti M, et al. (2014) Harnessing mosquito-  
501 Wolbachia symbiosis for vector and disease control. *Acta Trop* 132: S150-S163.
- 502 9. McGraw EA and O'Neill SL (2013) Beyond insecticides: new thinking on an ancient  
503 problem. *Nat Rev Microbiol* 11: 181-193.
- 504 10. Dutra HLC, Rocha MN, Dias FBS, Mansur SB, Caragata EP, et al. (2016) Wolbachia  
505 Blocks Currently Circulating Zika Virus Isolates in Brazilian *Aedes aegypti* Mosquitoes.  
506 *Cell Host & Microbe* 19: 771-774.
- 507 11. Moreira LA, Iturbe-Ormaetxe I, Jeffery JA, Lu GJ, Pyke AT, et al. (2009) A Wolbachia  
508 Symbiont in *Aedes aegypti* Limits Infection with Dengue, Chikungunya, and  
509 Plasmodium. *Cell* 139: 1268-1278.
- 510 12. Bian GW, Joshi D, Dong YM, Lu P, Zhou GL, et al. (2013) Wolbachia Invades  
511 *Anopheles stephensi* Populations and Induces Refractoriness to Plasmodium Infection.  
512 *Science* 340: 748-751.
- 513 13. Kambris Z, Cook PE, Phuc HK and Sinkins SP (2009) Immune Activation by Life-  
514 Shortening Wolbachia and Reduced Filarial Competence in Mosquitoes. *Science* 326:  
515 134-136.

- 516 14. Hughes GL, Koga R, Xue P, Fukatsu T and Rasgon JL (2011) Wolbachia Infections Are  
517 Virulent and Inhibit the Human Malaria Parasite Plasmodium Falciparum in Anopheles  
518 Gambiae. PLoS Path 7.
- 519 15. van den Hurk AF, Hall-Mendelin S, Pyke AT, Frentiu FD, McElroy K, et al. (2012) Impact  
520 of Wolbachia on Infection with Chikungunya and Yellow Fever Viruses in the Mosquito  
521 Vector Aedes aegypti. Plos Neglected Tropical Diseases 6.
- 522 16. Hoffmann AA, Montgomery BL, Popovici J, Iturbe-Ormaetxe I, Johnson PH, et al. (2011)  
523 Successful establishment of Wolbachia in Aedes populations to suppress dengue  
524 transmission. Nature 476: 454-U107.
- 525 17. O'Connor L, Plichart C, Sang AC, Brelsfoard CL, Bossin HC, et al. (2012) Open Release  
526 of Male Mosquitoes Infected with a Wolbachia Biopesticide: Field Performance and  
527 Infection Containment. Plos Neglected Tropical Diseases 6.
- 528 18. Walker T, Johnson PH, Moreira LA, Iturbe-Ormaetxe I, Frentiu FD, et al. (2011) The  
529 wMel Wolbachia strain blocks dengue and invades caged Aedes aegypti populations.  
530 Nature 476: 450-453.
- 531 19. Day JF and Shaman J (2011) Mosquito-Borne Arboviral Surveillance and the Prediction  
532 of Disease Outbreaks. In: D. Ruzek, editor editors. Flavivirus Encephalitis. InTech. pp.  
533 105-130. DOI: 110.5772/24068.
- 534 20. Ferraguti M, Martinez-de la Puente J, Roiz D, Ruiz S, Soriguer R, et al. (2016) Effects of  
535 landscape anthropization on mosquito community composition and abundance. Sci Rep  
536 6: 29002.
- 537 21. Vazquez-Prokopec GM, Chaves LF, Ritchie SA, Davis J and Kitron U (2010) Unforeseen  
538 Costs of Cutting Mosquito Surveillance Budgets. Plos Neglected Tropical Diseases 4.
- 539 22. Wilke ABB, Christe RD, Multini LC, Vidal PO, Wilk-da-Silva R, et al. (2016)  
540 Morphometric Wing Characters as a Tool for Mosquito Identification. Plos One 11.

- 541 23. Beier MS, Schwartz IK, Beier JC, Perkins PV, Onyango F, et al. (1988) Identification of  
542 Malaria Species by Elisa in Sporozoite and Oocyst Infected Anopheles from Western  
543 Kenya. *Am J Trop Med Hyg* 39: 323-327.
- 544 24. Burkhalter KL, Lindsay R, Anderson R, Dibernardo A, Fong W, et al. (2006) Evaluation  
545 of commercial assays for detecting West Nile virus antigen. *J Am Mosq Control Assoc*  
546 22: 64-69.
- 547 25. Appawu MA, Bosompem KM, Dadzie S, McKakpo US, Anim-Baidoo I, et al. (2003)  
548 Detection of malaria sporozoites by standard ELISA and VecTest (TM) dipstick assay in  
549 field-collected anopheline mosquitoes from a malaria endemic site in Ghana. *Trop Med*  
550 *Int Health* 8: 1012-1017.
- 551 26. Lee SF, White VL, Weeks AR, Hoffmann AA and Endersby NM (2012) High-Throughput  
552 PCR Assays To Monitor Wolbachia Infection in the Dengue Mosquito (*Aedes aegypti*)  
553 and *Drosophila simulans*. *Appl Environ Microbiol* 78: 4740-4743.
- 554 27. de Oliveira CD, Goncalves DS, Baton LA, Shimabukuro PHF, Carvalho FD, et al. (2015)  
555 Broader prevalence of Wolbachia in insects including potential human disease vectors.  
556 *Bull Entomol Res* 105: 305-315.
- 557 28. Zhou WG, Rousset F and O'Neill S (1998) Phylogeny and PCR-based classification of  
558 Wolbachia strains using wsp gene sequences. *Proceedings of the Royal Society B-*  
559 *Biological Sciences* 265: 509-515.
- 560 29. de Paz HD, Brotons P and Munoz-Almagro C (2014) Molecular isothermal techniques  
561 for combating infectious diseases: towards low-cost point-of-care diagnostics. *Expert*  
562 *Rev Mol Diagn* 14: 827-843.
- 563 30. Boyle DS, Lehman DA, Lillis L, Peterson D, Singhal M, et al. (2013) Rapid Detection of  
564 HIV-1 Proviral DNA for Early Infant Diagnosis Using Recombinase Polymerase  
565 Amplification. *Mbio* 4: pii: e00135-00113.



- 566 31. Rohrman BA and Richards-Kortum RR (2012) A paper and plastic device for performing  
567 recombinase polymerase amplification of HIV DNA. *Lab Chip* 12: 3082-3088.
- 568 32. Tomita N, Mori Y, Kanda H and Notomi T (2008) Loop-mediated isothermal amplification  
569 (LAMP) of gene sequences and simple visual detection of products. *Nature Protocols* 3:  
570 877-882.
- 571 33. Kuboki N, Sakurai T, Di Cello F, Grab DJ, Suzuki H, et al. (2003) Loop-mediated  
572 isothermal amplification for detection of African trypanosomes. *J Clin Microbiol* 41: 5517-  
573 5524.
- 574 34. Abbasi I, Kirstein OD, Hailu A and Warburg A (2016) Optimization of loop-mediated  
575 isothermal amplification (LAMP) assays for the detection of *Leishmania* DNA in human  
576 blood samples. *Acta Trop* 162: 20-26.
- 577 35. Zhang DY, Turberfield AJ, Yurke B and Winfree E (2007) Engineering entropy-driven  
578 reactions and networks catalyzed by DNA. *Science* 318: 1121-1125.
- 579 36. Seelig G, Soloveichik D, Zhang DY and Winfree E (2006) Enzyme-free nucleic acid logic  
580 circuits. *Science* 314: 1585-1588.
- 581 37. Yin P, Choi HM, Calvert CR and Pierce NA (2008) Programming biomolecular self-  
582 assembly pathways. *Nature* 451: 318-322.
- 583 38. Chakraborty K, Veetil AT, Jaffrey SR and Krishnan Y (2016) Nucleic Acid-Based  
584 Nanodevices in Biological Imaging. *Annual Review of Biochemistry*, Vol 85 85: 349-373.
- 585 39. Jiang YS, Bhadra S, Li B, Wu YR, Milligan JN, et al. (2015) Robust strand exchange  
586 reactions for the sequence-specific, real-time detection of nucleic acid amplicons. *Anal*  
587 *Chem* 87: 3314-3320.
- 588 40. Zhang DY and Winfree E (2009) Control of DNA strand displacement kinetics using  
589 toehold exchange. *J Am Chem Soc* 131: 17303-17314.

- 590 41. Bhadra S, Jiang YS, Kumar MR, Johnson RF, Hensley LE, et al. (2015) Real-time  
591 sequence-validated loop-mediated isothermal amplification assays for detection of  
592 Middle East respiratory syndrome coronavirus (MERS-CoV). *PLoS One* 10: e0123126.
- 593 42. Jiang YS, Riedel TE, Popoola JA, Morrow BR, Cai S, et al. (2017) Portable platform for  
594 rapid in-field identification of human fecal pollution in water. *Water Res* 131: 186-195.
- 595 43. Jiang YS, Stacy A, Whiteley M, Ellington AD and Bhadra S (2017) Amplicon Competition  
596 Enables End-Point Quantitation of Nucleic Acids Following Isothermal Amplification.  
597 *Chembiochem*: doi: 10.1002/cbic.201700317.
- 598 44. Gibson DG, Young L, Chuang RY, Venter JC, Hutchison CA, et al. (2009) Enzymatic  
599 assembly of DNA molecules up to several hundred kilobases. *Nat Methods* 6: 343-345.
- 600 45. Altschul SF, Gish W, Miller W, Myers EW and Lipman DJ (1990) Basic local alignment  
601 search tool. *J Mol Biol* 215: 403-410.
- 602 46. Altschul SF, Madden TL, Schaffer AA, Zhang J, Zhang Z, et al. (1997) Gapped BLAST  
603 and PSI-BLAST: a new generation of protein database search programs. *Nucleic Acids*  
604 *Res* 25: 3389-3402.
- 605 47. Notomi T, Okayama H, Masubuchi H, Yonekawa T, Watanabe K, et al. (2000) Loop-  
606 mediated isothermal amplification of DNA. *Nucleic Acids Res* 28: E63.
- 607 48. Batovska J, Blacket MJ, Brown K and Lynch SE (2016) Molecular identification of  
608 mosquitoes (Diptera: Culicidae) in southeastern Australia. *Ecology and Evolution* 6:  
609 3001-3011.
- 610 49. Ratnasingham S and Hebert PDN (2007) BOLD: The Barcode of Life Data System  
611 ([www.barcodinglife.org](http://www.barcodinglife.org)). *Mol Ecol Notes* 7: 355-364.
- 612 50. Cywinska A, Hunter FF and Hebert PDN (2006) Identifying Canadian mosquito species  
613 through DNA barcodes. *Med Vet Entomol* 20: 413-424.
- 614 51. Wang G, Li CX, Guo XX, Xing D, Dong YD, et al. (2012) Identifying the Main Mosquito  
615 Species in China Based on DNA Barcoding. *Plos One* 7.

- 616 52. Parvizi P, Bordbar A and Najafzadeh N (2013) Detection of *Wolbachia pipientis*,  
617 including a new strain containing the *wsp* gene, in two sister species of  
618 *Paraphlebotomus* sandflies, potential vectors of zoonotic cutaneous leishmaniasis. *Mem*  
619 *Inst Oswaldo Cruz* 108: 414-420.
- 620 53. de Valdez MRW (2017) Mosquito species distribution across urban, suburban, and semi-  
621 rural residences in San Antonio, Texas. *J Vector Ecol* 42: 184-188.
- 622 54. Leisnham PT, LaDeau SL and Juliano SA (2014) Spatial and temporal habitat  
623 segregation of mosquitoes in urban Florida. *PLoS One* 9: e91655.
- 624 55. Konishi E (1989) Size of Blood Meals of *Aedes-Albopictus* and *Culex-Tritaeniorhynchus*  
625 (Diptera, Culicidae) Feeding on an Unrestrained Dog Infected with *Dirofilaria-Immitis*  
626 (Spirurida, Filariidae). *J Med Entomol* 26: 535-538.
- 627 56. Rasgon JL and Scott TW (2004) An initial survey for *Wolbachia* (Rickettsiales :  
628 Rickettsiaceae) infections in selected california mosquitoes (Diptera : Culicidae). *J Med*  
629 *Entomol* 41: 255-257.
- 630 57. Kittayapong P, Baisley KJ, Baimai V and O'Neill SL (2000) Distribution and diversity of  
631 *Wolbachia* infections in southeast Asian mosquitoes (Diptera : Culicidae). *J Med*  
632 *Entomol* 37: 340-345.
- 633 58. Ahmad NA, Vythilingam I, Lim YAL, Zabari NZAM and Lee HL (2017) Detection of  
634 *Wolbachia* in *Aedes albopictus* and Their Effects on Chikungunya Virus. *Am J Trop Med*  
635 *Hyg* 96: 148-156.
- 636 59. Sikulu-Lord MT, Maia MF, Milali MP, Henry M, Mkandawile G, et al. (2016) Rapid and  
637 Non-destructive Detection and Identification of Two Strains of *Wolbachia* in *Aedes*  
638 *aegypti* by Near-Infrared Spectroscopy. *PLoS Negl Trop Dis* 10: e0004759.
- 639 60. Khoshmanesh A, Christensen D, Perez-Guaita D, Iturbe-Ormaetxe I, O'Neill SL, et al.  
640 (2017) Screening of *Wolbachia* Endosymbiont Infection in *Aedes aegypti* Mosquitoes

- 641 Using Attenuated Total Reflection Mid-Infrared Spectroscopy. *Anal Chem* 89: 5285-  
642 5293.
- 643 61. Goncalves Dda S, Cassimiro AP, de Oliveira CD, Rodrigues NB and Moreira LA (2014)  
644 *Wolbachia* detection in insects through LAMP: loop mediated isothermal amplification.  
645 *Parasit Vectors* 7: 228.
- 646 62. Aonuma H, Yoshimura A, Perera N, Shinzawa N, Bando H, et al. (2009) Loop-mediated  
647 isothermal amplification applied to filarial parasites detection in the mosquito vectors:  
648 *Dirofilaria immitis* as a study model. *Parasit Vectors* 2: 15.
- 649 63. Bonizzoni M, Afrane Y and Yan G (2009) Loop-mediated isothermal amplification  
650 (LAMP) for rapid identification of *Anopheles gambiae* and *Anopheles arabiensis*  
651 mosquitoes. *Am J Trop Med Hyg* 81: 1030-1034.
- 652 64. Escadafal C, Faye O, Sall AA, Faye O, Weidmann M, et al. (2014) Rapid molecular  
653 assays for the detection of yellow fever virus in low-resource settings. *PLoS Negl Trop*  
654 *Dis* 8: e2730.
- 655 65. de Silva AP and Uchiyama S (2007) Molecular logic and computing. *Nature*  
656 *nanotechnology* 2: 399-410.
- 657 66. Jung C and Ellington AD (2014) Diagnostic applications of nucleic acid circuits. *Acc*  
658 *Chem Res* 47: 1825-1835.
- 659 67. Du Y, Hughes RA, Bhadra S, Jiang YS, Ellington AD, et al. (2015) A Sweet Spot for  
660 Molecular Diagnostics: Coupling Isothermal Amplification and Strand Exchange Circuits  
661 to Glucometers. *Sci Rep* 5: 11039.
- 662 68. Li B, Ellington AD and Chen X (2011) Rational, modular adaptation of enzyme-free DNA  
663 circuits to multiple detection methods. *Nucleic Acids Res* 39: e110.
- 664 69. Allen PB, Arshad SA, Li B, Chen X and Ellington AD (2012) DNA circuits as amplifiers  
665 for the detection of nucleic acids on a paperfluidic platform. *Lab Chip* 12: 2951-2958.

- 666 70. Joubert DA, Walker T, Carrington LB, De Bruyne JT, Kien DHT, et al. (2016)  
667 Establishment of a Wolbachia Superinfection in *Aedes aegypti* Mosquitoes as a Potential  
668 Approach for Future Resistance Management. *PLoS Path* 12.
- 669 71. Ant TH, Herd CS, Geoghegan V, Hoffmann AA and Sinkins SP (2018) The Wolbachia  
670 strain wAu provides highly efficient virus transmission blocking in *Aedes aegypti*. *PLoS*  
671 *Path* 14.
- 672 72. Bordenstein SR, Brothers C, Wolfe G, Bahr M, Minckley RL, et al. (2010) Using the  
673 Wolbachia Bacterial Symbiont to Teach Inquiry-Based Science: A High School  
674 Laboratory Series. *American Biology Teacher* 72: 478-483.
- 675 73. Aonuma H, Yoshimura A, Perera N, Shinzawa N, Bando H, et al. (2009) Loop-mediated  
676 isothermal amplification applied to filarial parasites detection in the mosquito vectors:  
677 *Dirofilaria immitis* as a study model. *Parasites & Vectors* 2.
- 678 74. Aonuma H, Suzuki M, Iseki H, Perera N, Nelson B, et al. (2008) Rapid identification of  
679 Plasmodium-carrying mosquitoes using loop-mediated isothermal amplification. *Biochem*  
680 *Biophys Res Commun* 376: 671-676.
- 681 75. Mao R, Ge G, Wang Z, Hao RZ, Zhang GH, et al. (2018) A multiplex microfluidic loop-  
682 mediated isothermal amplification array for detection of malaria-related parasites and  
683 vectors. *Acta Trop* 178: 86-92.
- 684 76. Aonuma H, Badolo A, Okado K and Kanuka H (2013) Detection of mutation by allele-  
685 specific loop-mediated isothermal amplification (AS-LAMP). *Methods Mol Biol* 1039:  
686 121-127.
- 687 77. Hegde S, Rasgon JL and Hughes GL (2015) The microbiome modulates arbovirus  
688 transmission in mosquitoes. *Current Opinion in Virology* 15: 97-102.
- 689 78. Saraiva RG, Kang S, Simoes ML, Anglero-Rodriguez YI and Dimopoulos G (2016)  
690 Mosquito gut antiparasitic and antiviral immunity. *Dev Comp Immunol* 64: 53-64.

691 79. Vasilakis N and Tesh RB (2015) Insect-specific viruses and their potential impact on  
692 arbovirus transmission. *Current Opinion in Virology* 15: 69-74.

693

## 694 **Supporting information**

695 **S1 Table. Primers, probes, and target sequences for *A. aegypti* coi and *Wolbachia***  
696 **wAlbB/wPip wsp LAMP-OSD assays.**

697 **S2 Fig. LAMP-OSD schematic.** LAMP uses 2 inner (FIP and BIP) and 2 outer (F3 and B3)  
698 primers specific to 6 blocks of target sequences designated as B3, B2, B1, F1c, F2c and F3c. F2  
699 sequence in FIP (F1c-F2) initiates amplification by Bst DNA polymerase (Stage I).  
700 F1c sequence in FIP self-primers subsequent amplification. Similarly, BIP (B1c-B2) initiates DNA  
701 synthesis by binding to B2c. F3 and B3 primer-initiated DNA synthesis displaces preceding inner  
702 primer-initiated strands, which serve as templates for primer-initiated strand displacement DNA  
703 synthesis (Stage II). 3'-ends of the resulting single-stranded, dumbbell-shaped amplicons (Stage  
704 III) are extended by Bst polymerase to form hairpins (Stage IV). Inner primers hybridize to the  
705 single-stranded loops and initiate another round of strand displacement synthesis that opens the  
706 original hairpin to form a concatemeric amplicon containing a self-priming 3'-end hairpin (Stage  
707 V). The ensuing continuous amplification (initiated both by new inner primers and by self-priming)  
708 generates increasingly complex, double-stranded concatameric amplicons containing self-  
709 priming hairpins and single-stranded loops to which the OSD probe hybridizes. "c": denotes  
710 complementary target sequences. F and Q on the OSD denote fluorophore and quencher,  
711 respectively. OSD probe is denoted in terms of numbered domains, each of which represents a  
712 short fragment (usually <12 nt) of DNA sequence in an otherwise continuous oligonucleotide

713 strand. Single stranded toeholds are numbered in red. Complementarity between numbered OSD  
714 domains is denoted by a single prime symbol.

715 **S3 Fig. Alignment of *wsp* sequences from different *Wolbachia* strains.** “Current *wsp* OSD”  
716 refers to the *wsp* OSD probe used in the present study that binds to the loop sequence between  
717 the F1 and F2 target regions. It would not distinguish the closely related *wAlbB* and *wPip* strains.  
718 The “*wAlbB* vs *wPip* OSD”, which would bind to the loop region between the B1 and B2 regions  
719 of our current *wsp* LAMP assay would allow discrimination of *wAlbB* and *wPip* strains due to  
720 specificity of interaction with the three highlighted polymorphic positions. The *wsp* sequences of  
721 the remaining *Wolbachia* strains are significantly different from *wAlbB* *wsp* sequence. Hence, the  
722 *wsp* LAMP-OSD assay described here will not detect these strains.

723 **S4 Fig. Detection of *Wolbachia wPip* using *wsp* LAMP-OSD assay.** *Wolbachia wMel*-infected  
724 *Drosophila melanogaster* (A), *Wolbachia* uninfected *Culex tarsalis* (B), *Wolbachia wPip* infected  
725 *Culex quinquefasciatus* (Houston) (C) and *Culex quinquefasciatus* (Salvador) (D) were analyzed  
726 using the *wsp* LAMP-OSD assay. 2  $\mu$ L of crudely crushed individual insect samples (crushed  
727 individual fruit flies were resuspended in 20  $\mu$ L water) were subjected to LAMP amplification for  
728 90 min. OSD fluorescence was imaged at endpoint using a cellphone.

729 **S5 Fig. Effect of crude mosquito sample on the detection limit of visually-read LAMP-OSD.**  
730 Indicated copies of recombinant plasmids bearing *coi* or *wsp* target sequences were amplified by  
731 the *coi*-specific (A) or *wsp*-specific (B) LAMP-OSD assays, respectively. 8% volume of all LAMP-  
732 OSD reactions was composed of crudely ‘in-syringe’ prepared non-specific mosquito sample.  
733 OSD fluorescence was imaged at endpoint using a cellphone.

734 **S6 Fig. Blinded LAMP-OSD analysis of field-caught mosquitoes.** Mosquitoes stored for one  
735 week at the indicated temperatures were prepared by ‘in-tube’ crude processing. 2  $\mu$ L of a 1:10

736 dilution of each mosquito sample was analyzed by *coi* LAMP-OSD (A) and by *wsp* LAMP-OSD  
737 (B) assays. OSD fluorescence was imaged at endpoint using a smartphone.

738 **S7 Fig. Blinded LAMP-OSD analysis of field-caught mosquitoes.** Mosquitoes stored for two  
739 weeks at the indicated temperatures were prepared by 'in-tube' crude processing. 2  $\mu$ L of a 1:10  
740 dilution of each mosquito sample was analyzed by *coi* LAMP-OSD (A) and by *wsp* LAMP-OSD  
741 (B) assays. OSD fluorescence was imaged at endpoint using a smartphone.

742 **S8 Fig. Blinded LAMP-OSD analysis of field-caught mosquitoes.** Mosquitoes stored for  
743 three weeks at the indicated temperatures were prepared by 'in-tube' crude processing. 2  $\mu$ L of  
744 a 1:10 dilution of each mosquito sample was analyzed by *coi* LAMP-OSD (A) and by *wsp*  
745 LAMP-OSD (B) assays. OSD fluorescence was imaged at endpoint using a smartphone.



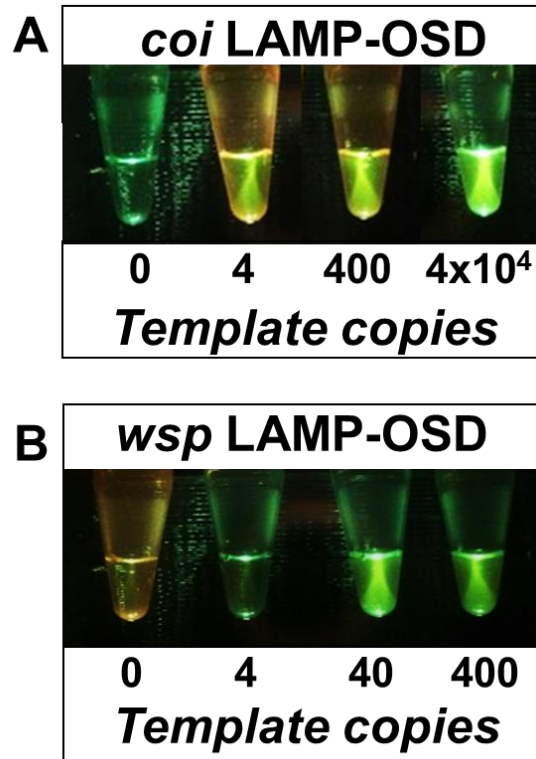

**Fig 1. Detection of *Ae. aegypti coi* gene and *Wolbachia wAlbB wsp* gene using visually read LAMP-OSD assays.** Indicated copies of recombinant plasmids bearing *coi* or *wsp* target sequences were amplified by the *coi*-specific (A) or *wsp*-specific (B) LAMP-OSD assays, respectively. OSD fluorescence was imaged at endpoint using a cellphone.

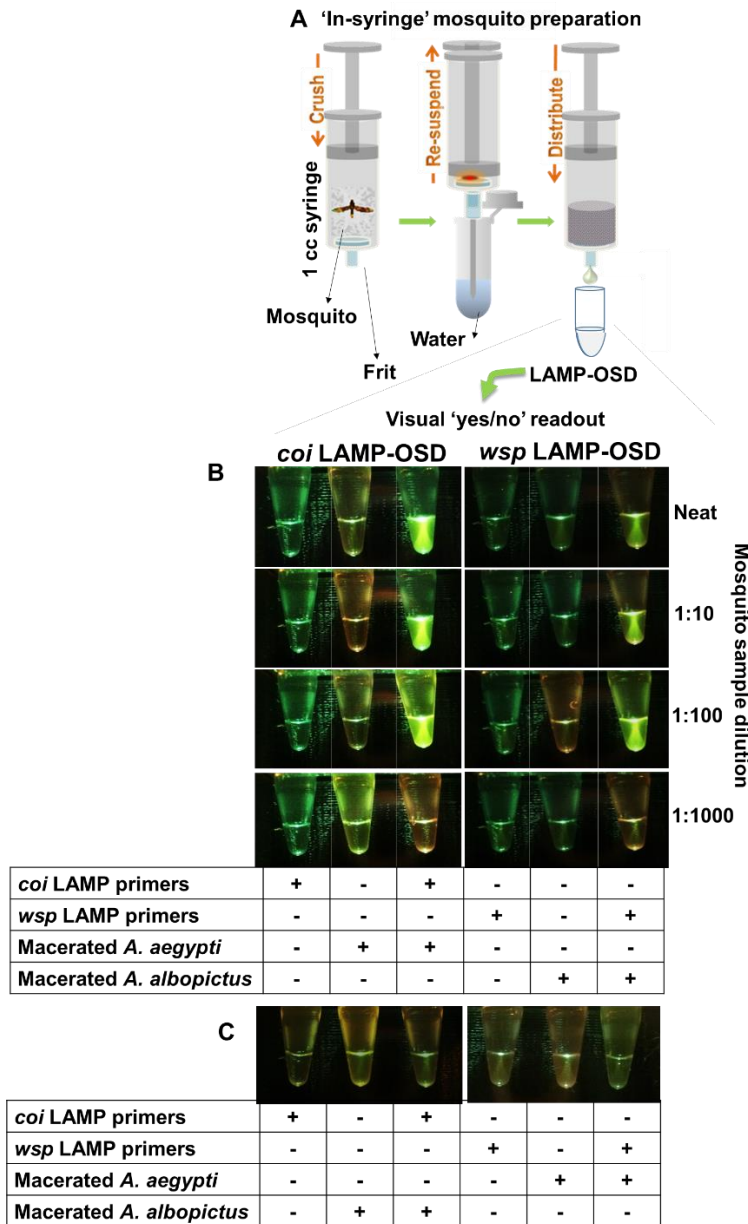

**Fig 2. Visually read LAMP-OSD analysis of crudely processed mosquito samples. (A)**

Schematic depicting rapid preparation of crude mosquito samples for direct LAMP-OSD analysis by performing in-syringe individual mosquito maceration. **(B)** Analysis of individual *Ae. aegypti* and *wAlbB Wolbachia*-infected *Ae. albopictus* mosquitoes by *coi* and *wsp* LAMP-OSD assays, respectively. 2  $\mu$ L of mosquito samples were either added directly to LAMP-OSD assays or subjected to 10-fold serial dilution in water prior to introduction in LAMP-OSD reactions. LAMP-OSD reactions without any macerated mosquito samples served as negative controls. Assays lacking LAMP primers but containing macerated mosquito samples served as controls for monitoring background fluorescence. **(C)** Specificity analysis of *coi* and *wsp* LAMP-OSD assays. The *coi* LAMP-OSD assay was challenged with 2  $\mu$ L of *Ae. albopictus* in-syringe prepared crude mosquito sample. Similarly, the *wsp* LAMP-OSD assay was challenged with *Ae. aegypti* sample. In all experiments, OSD fluorescence was imaged at endpoint using a cellphone.

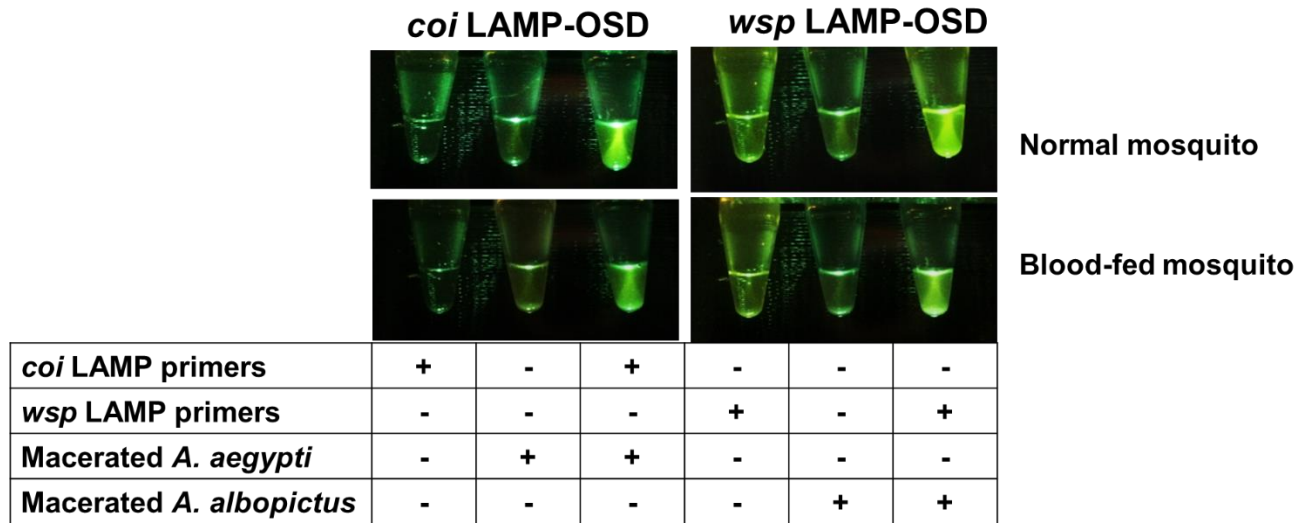

**Fig 3. Effect of blood meal on LAMP-OSD analysis of crudely prepared individual mosquitoes.** Individual normal or blood-fed *Ae. aegypti* and *Ae. albopictus* mosquitoes were prepared by the in-syringe method. 2  $\mu$ L of these mosquito samples were analyzed by *coi* and *wsp* LAMP-OSD assays. LAMP-OSD reactions without any macerated mosquito samples served as negative controls. Assays lacking LAMP primers but containing macerated mosquito samples served as controls for monitoring background fluorescence. LAMP-OSD fluorescence was imaged at endpoint using a cellphone.

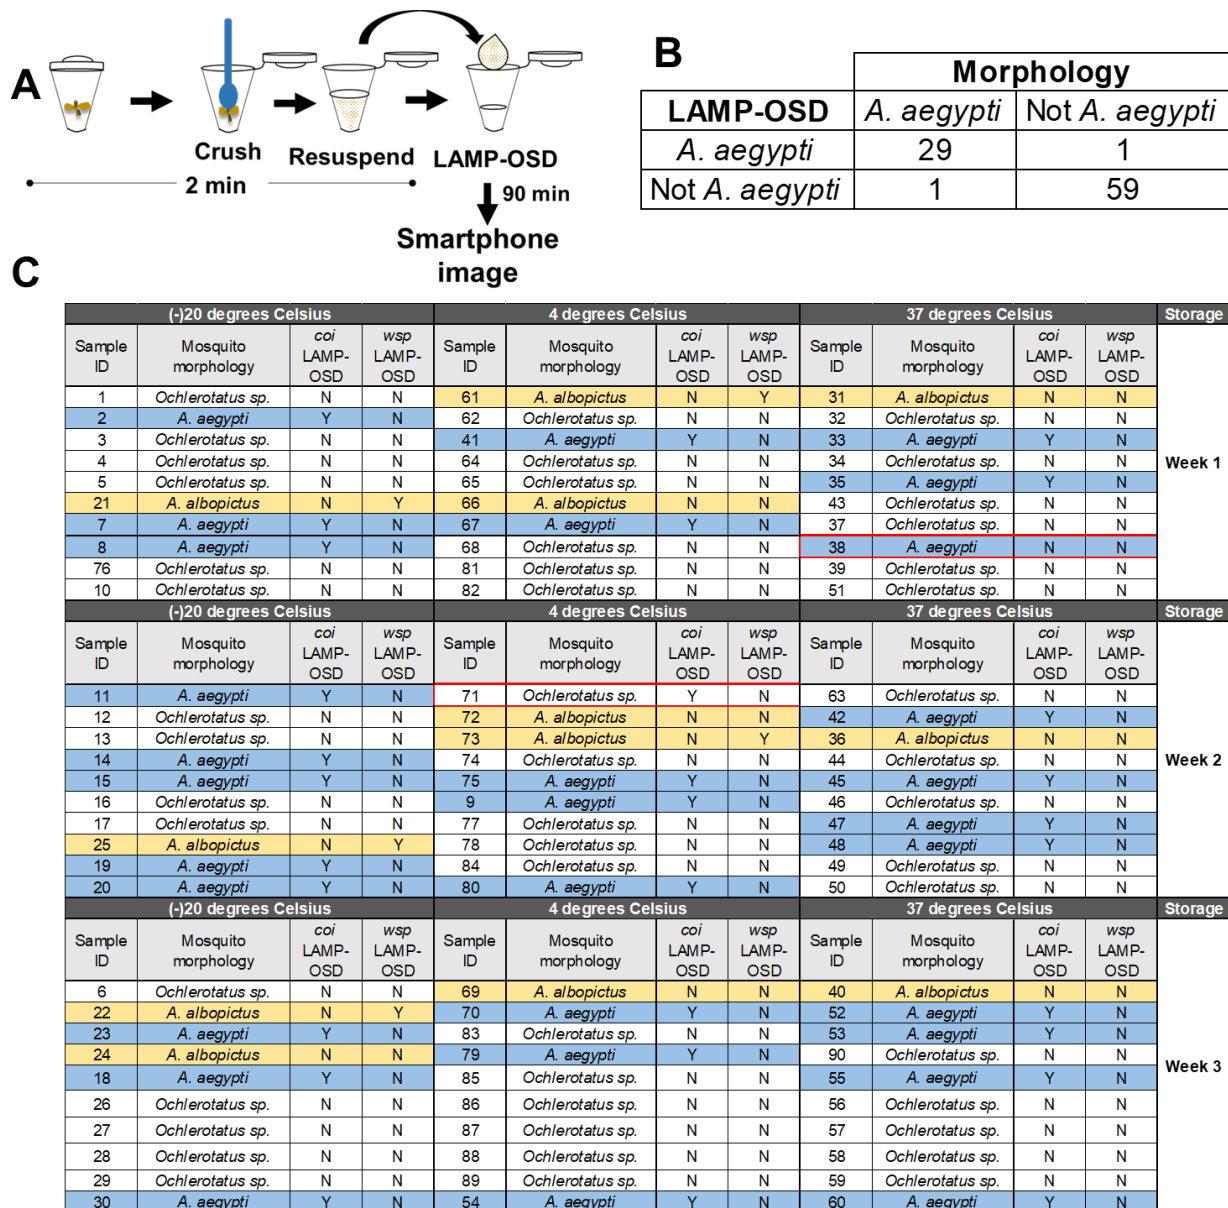

**Fig 4. Blinded LAMP-OSD analysis of field-caught mosquitoes.** Mosquitoes stored for up to three weeks at the indicated temperatures were prepared by 'in-tube' crude processing. 2  $\mu$ L of a 1:10 dilution of each mosquito sample was analyzed by *wsp* and *coi* LAMP-OSD assays. OSD fluorescence was imaged at endpoint using a cellphone. **(A)** Schematic depicting 'in-tube' method for rapid preparation of field-caught mosquitoes for LAMP-OSD analysis. **(B)** Comparison of *coi* LAMP-OSD results with morphological identification using 2X2 contingency table. **(C)** Tabulation of *coi* and *wsp* LAMP-OSD readout for each mosquito in the study. *Ae. aegypti*, *Ae. albopictus* and *Ochlerotatus* species are highlighted in blue, orange and white, respectively. 'Y' indicates a positive LAMP-OSD signal (bright fluorescence). 'N' indicates absence of any fluorescence signal in the LAMP-OSD reaction. Red boxes highlight LAMP-OSD tests that generated false positive or false negative outcomes.
